# Supplementary material for: Cell cycle arrest and p53 prevent ON-target megabase-scale rearrangements induced by CRISPR-Cas9
Source: PubMed Central journal article supplement (PMC10333231; doi:10.1038/s41467-023-39632-w), 2023-07-10
Supplement: 41467_2023_39632_MOESM1_ESM.pdf [file 41467_2023_39632_MOESM1_ESM.pdf]

a

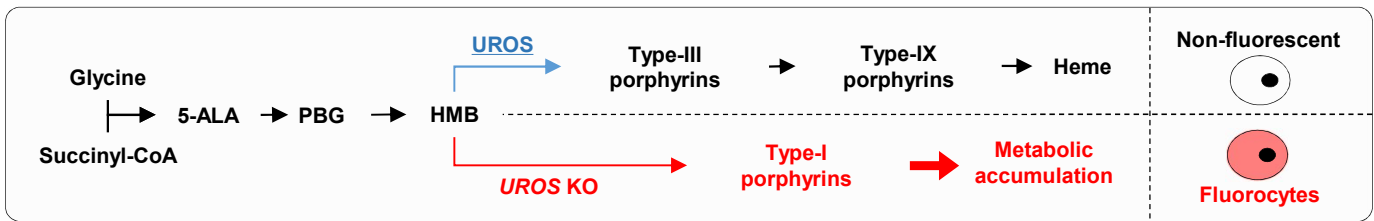

b

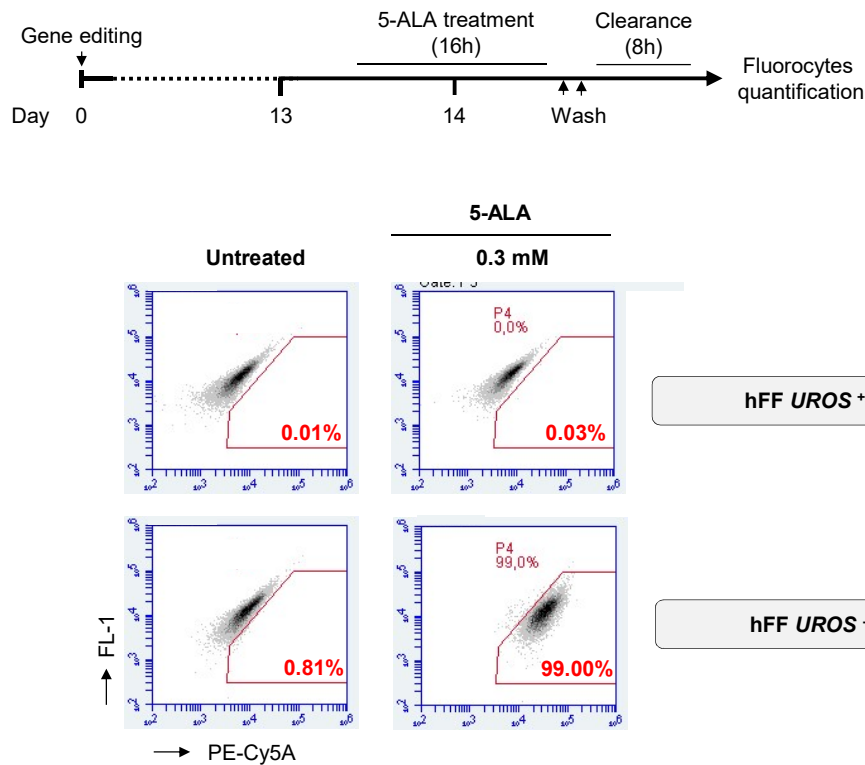

**Supplementary Fig. 1. Heme biosynthesis and porphyrins accumulation.** (a) Scheme of the heme biosynthesis. When UROS enzyme is functional, it leads to heme biosynthesis through type-III and type-IX porphyrins formation. When UROS enzyme is totally impaired in erythroid lineage, HMB spontaneously forms type-I porphyrins that cannot continue biosynthesis pathway (metabolic dead-end). If sufficient level of type-I porphyrins accumulates, it turns the cell into fluorocytes. 5-ALA: 5-amino-levulinic acid; PBG: porphobilinogen; HMB: hydroxymethylbilane. UROS: uroporphyrinogen-III synthase (EC 4.2.1.75). (b) Detection of UROS impairment by cytometry in fibroblasts required a transient and low exposure to 5-ALA (0.3mM, overnight) followed by an 8h-clearance. Illustrative cytometry: *UROS*<sup>+/-</sup> fibroblasts, used in FAMReD, have residual UROS enzymatic activity and are not fluorescent, even with 5-ALA exposure. In contrast, *UROS*<sup>-/-</sup> fibroblasts, have no residual UROS activity and are fluorescent.

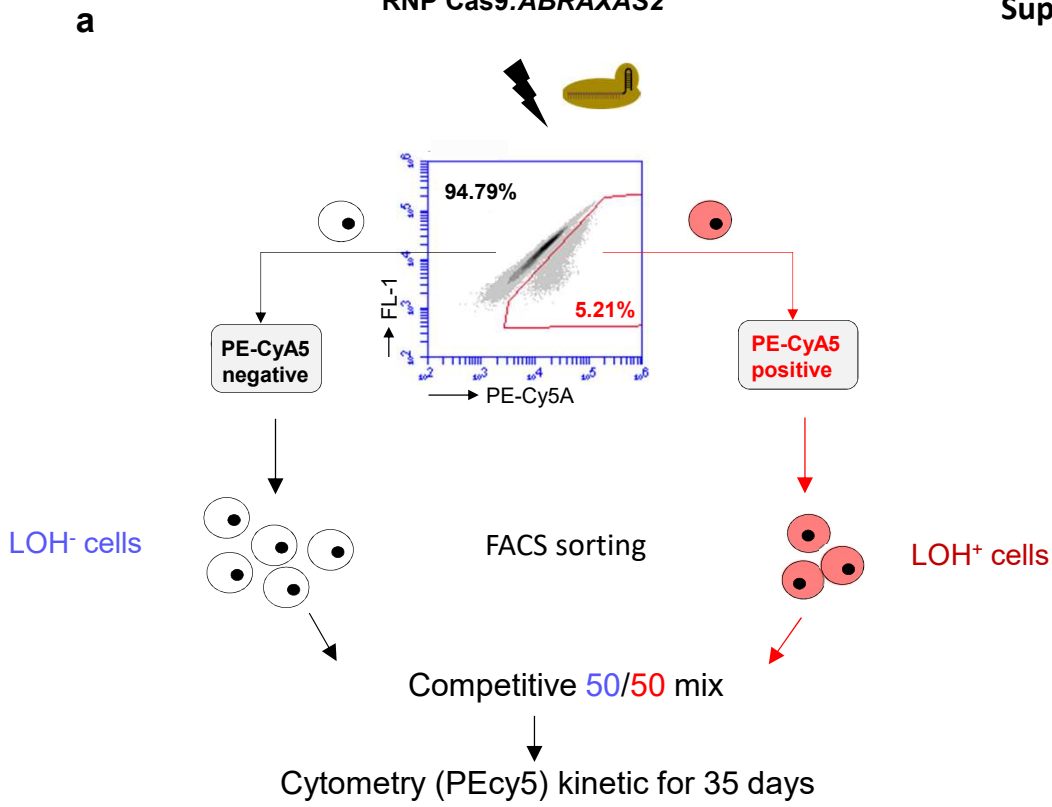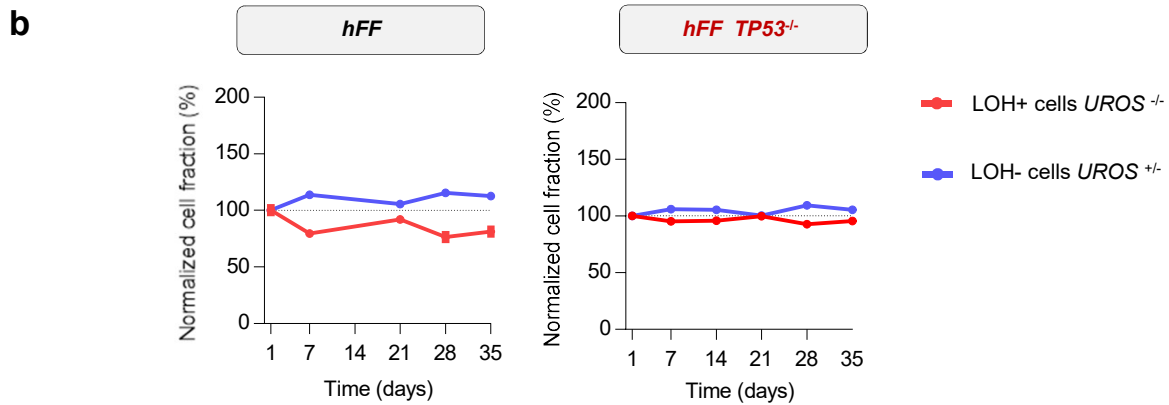

**Supplementary Fig. 2. LOH appearance, with *UROS* homozygous mutations, does not impair cell proliferation.** **a**, To affirm that proliferation of cells with LOH (*UROS*<sup>-/-</sup>) is not disturbed, we performed a sorting of LOH<sup>+</sup> cells (*UROS*<sup>-/-</sup> in red) and LOH<sup>-</sup> heterozygous *UROS*<sup>+/-</sup> cells (in blue) and compare their proliferation by a competitive assay (mix 50:50) for 35 days. **b**, We did not observe selective advantage of one population, neither in WT fibroblasts (n = 3 independent experiments) nor in *TP53*<sup>-/-</sup> fibroblasts (n = 2 independent experiments). LOH cells are stable in long-term culture.

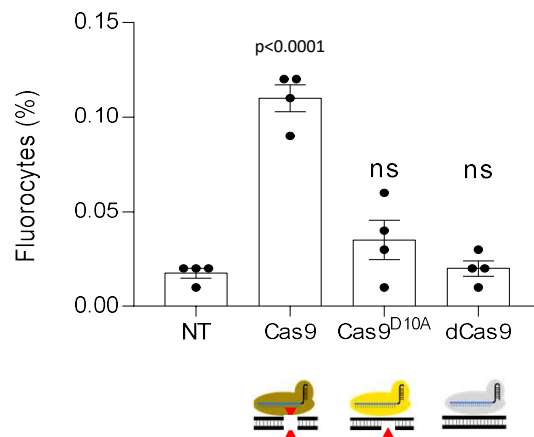

**Supplementary Fig. 3: Example of FAMReD application.** Fluorocytes quantification in not transfected (NT) or transfected hFF with either Cas9 nuclease, Cas9<sup>D10A</sup> nickase or dead Cas9 (dCas9) complexed with a gRNA targeting *ABRAXAS2*, (mean±SD, n=4 independent experiments). One way Anova test used to compare two groups.

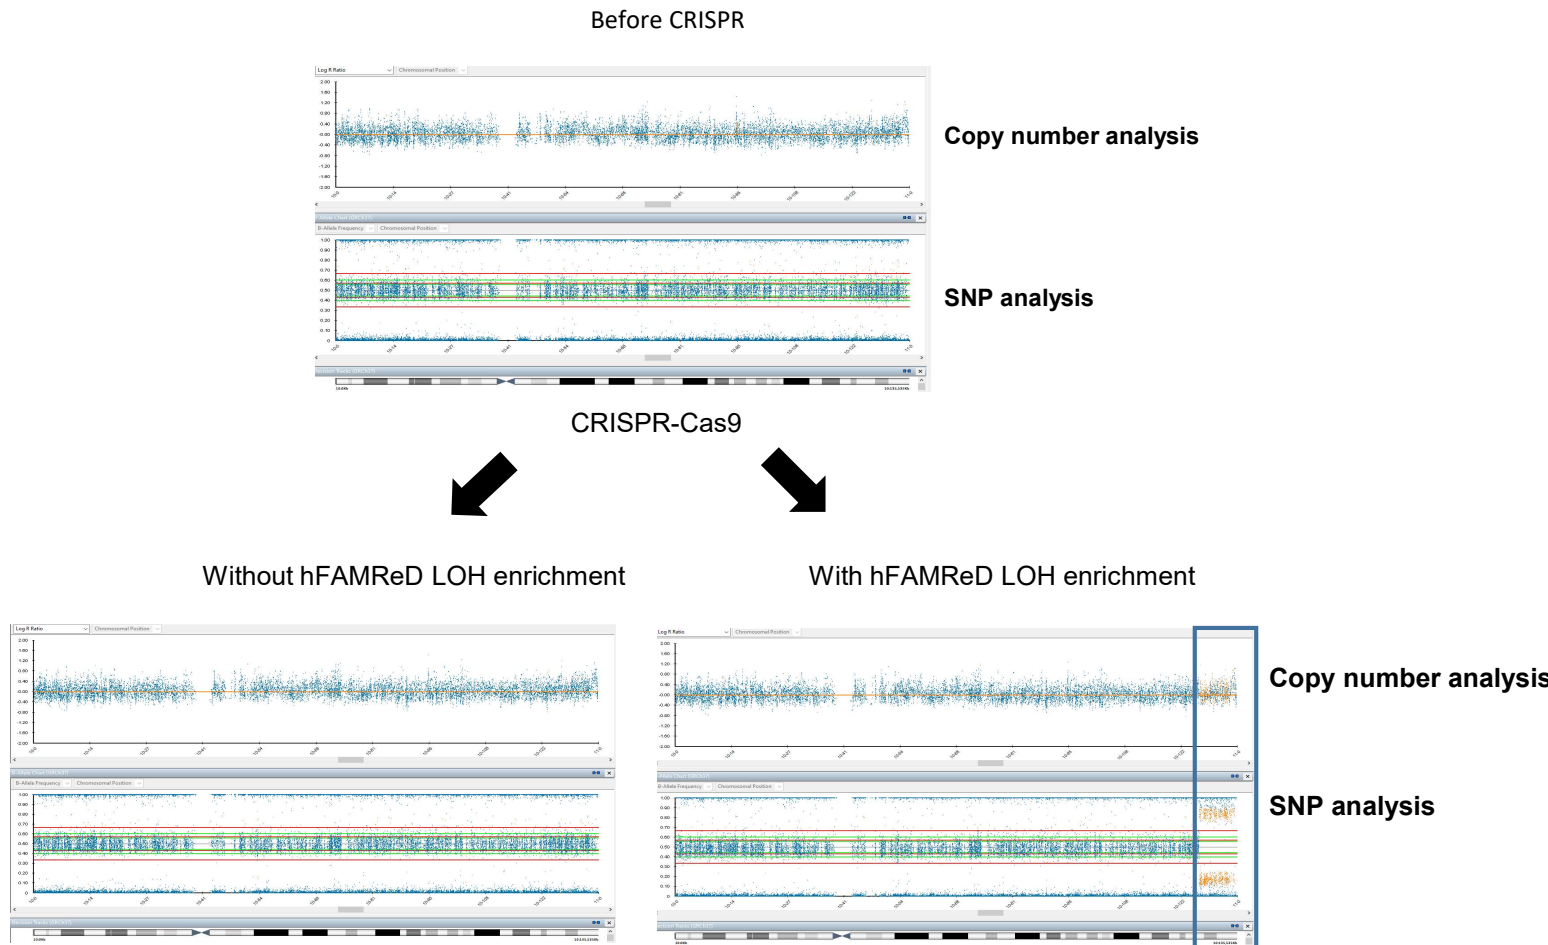

**Supplementary Fig. 4. hFAMReD is required to reveal LOH induced by CRISPR targeting *ABRAXAS2* in WT hFF. LOH are not detectable by cGH/SNP array without FAMReD system (under limit of detection) and detected after hFAMReD cell sorting enrichment.**

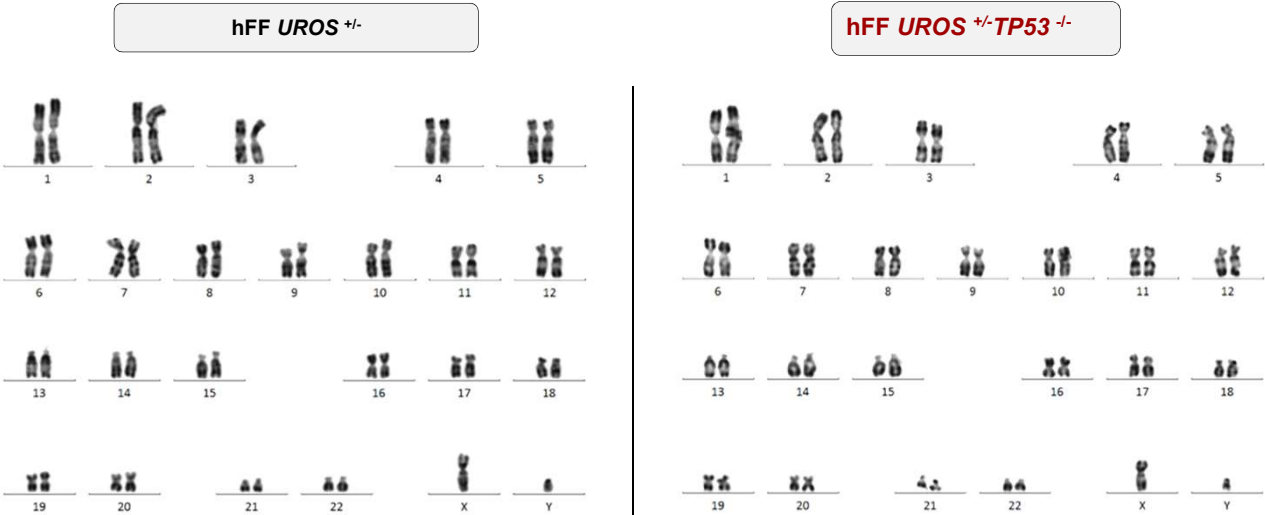

**Supplementary Fig. 5. Karyotype of generated fibroblast cell lines:** before (left panel) and after *TP53* invalidation by CRISPR-Cas9 (right panel). The two cell lines maintained a normal karyotype in all analyzed nuclei.



|                 |              | qPCR TdTomato |          | qPCR b actin |          | Tomato/b actin | copy number |
|-----------------|--------------|---------------|----------|--------------|----------|----------------|-------------|
|                 |              | Ct            | Delta Ct | Ct           | Delta Ct |                |             |
| cell sorting #1 | Tomato + MEF | 20.86         | 6.29     | 16.76        | 1.95     | 0.058314562    | 1           |
|                 | Tomato - MEF | 27.15         |          | 18.71        |          | 0.002879432    | 0.049       |
| cell sorting #2 | Tomato + MEF | 24.32         | 4.59     | 18.13        | 0.19     | 0.013696964    | 1           |
|                 | Tomato - MEF | 28.91         |          | 18.32        |          | 0.000648772    | 0.047       |

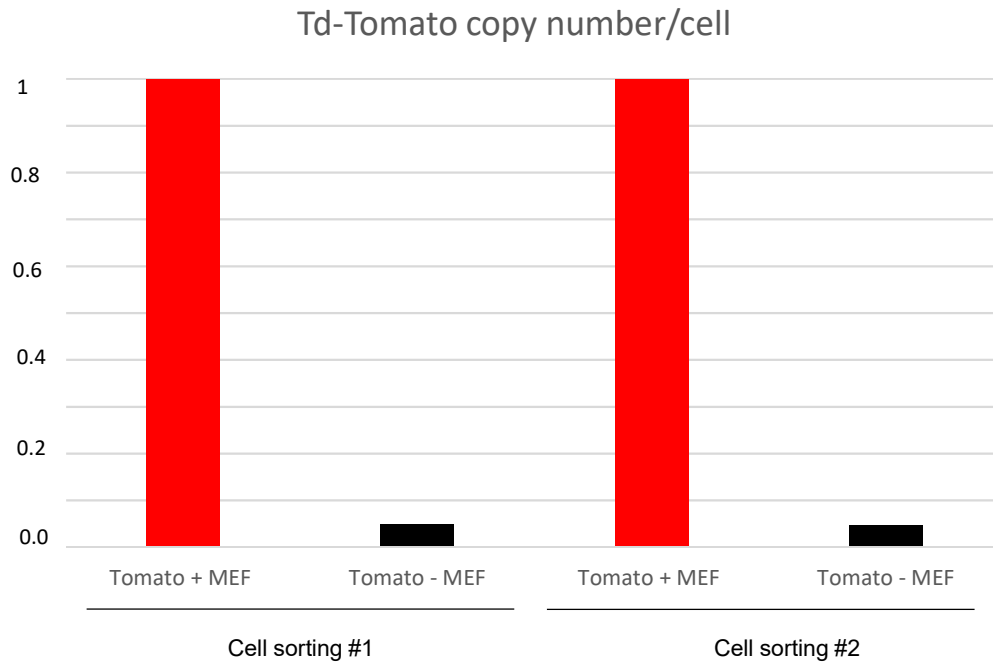

**Supplementary figure 7:** qPCR of *Td-Tomato* transgene in MEF cells after cell sorting of *Td-tomato*<sup>pos</sup> and *Td-tomato*<sup>neg</sup> by cytometry, to demonstrate genomic *TdTomato* loss and LOH telomeric to *Arl8b* after cut by CRISPR-Cas9 nuclease.

**Supplementary Table 1: predicted OFF-target sites by IDT website and CRISPOR software**

| <b>Séquence</b>      | <b>PAM</b> | <b>Locus OFF-T IDT</b>     |                   |
|----------------------|------------|----------------------------|-------------------|
| GAGATCCTCCCACTCGATGG | AGG        | ABRAXAS2: target           | Chr10q:-124829881 |
| TTGATCTTCCCACTCAATGG | AGG        | Off-target 1               | Ch13:-87362303    |
| GGCATCCTCCCACTCAATGG | CAG        | Off-target 2               | Chr6:-166445710   |
| GATGTCATCCCACTCAATGG | TGG        | Off-target 3               | Ch15:+76145921    |
| AAGATCAGCCCACTAGATGG | AAG        | Off-target 4               | Chr6:+6923378     |
| GAGGTCTTCTCACTCGATGC | TGG        | Off-target 5               | Chr16:+11640559   |
| GAGAGCCCCCACTCAGTGG  | GGG        | Off-target 6               | Chr20:+62663672   |
| CAGATCCCACCACTCAATGG | GAG        | Off-target 7               | Chr3:+99808837    |
| CAGACCCTCCAACCCGATGG | AAG        | Off-target 8               | Chr10p:+21820668  |
| TATATCCTGCCACTCGATGG | GAG        | Off-target 9               | Chr3:-11162298    |
| GAGAACCACCCACACGATGG | CAG        | Off-target 10              | Chr3:-16129034    |
| <b>Séquence</b>      | <b>PAM</b> | <b>Locus OFF-T CRISPOR</b> |                   |
| GAGATCCTCCCACTCGATGG | AGG        | ABRAXAS2: target           | Chr10q:-124829881 |
| TTGATCTTCCCACTCAATGG | AGG        | Off-target 1               | Chr13:-88014556   |
| GAGGTCATCACACTCGAAGG | AGG        | Off-target 2               | Chr16:+7294761    |
| GATGTCATCCCACTCAATGG | TGG        | Off-target 3               | Chr15:+76438263   |
| GAGGTCTTCTCACTCGATGC | TGG        | Off-target 4               | Chr16:+11734416   |
| GAGATTCTCCAATAAATGG  | CGG        | Off-target 5               | Chr3:+142747326   |
| AAAATCCTTCCACTAGATGG | CGG        | Off-target 6               | Chr18:+39694473   |
| GGGCTGCTCACACTCGATGG | TGG        | Off-target 7               | Chr13:-113473682  |
| GAGAGCCCCCACTCAGTGG  | GGG        | Off-target 8               | Chr20:+61295025   |
| GTGACCCTCCCACTCATTGG | AGG        | Off-target 9               | Chr3:-194600571   |
| GAGAACTTCCCACTCACTGG | GGG        | Off-target 10              | Chr14:-70161749   |



**Supplementary Table 2: gRNA sequences for CRISPR-Cas9 editing.**

| <b>Guide RNA sequences</b> |                      |
|----------------------------|----------------------|
| <i>UROS</i>                | GGAAGCAGCAGAGTTATGTT |
| <i>TP53</i>                | CCATTGTTCAATATCGTCCG |
| <i>ABRAXAS2</i>            | GAGATCCTCCCACTCGATGG |
| <i>SORCS1</i>              | TGATAGACGGTGTGCCGAAG |
| b-Globin region 1          | ACCAATAGAAACTGGGCATG |
| b-Globin region 2          | AGGGTGCTACATACTTCTTA |
| <i>CPXM2</i>               | GCCTCATGACAGACGCCCGG |
| <i>PLEKHA1</i>             | CTGGCGCCATTGTAGCACAG |
| <i>TRUB1</i>               | ATACACTAGATTCTACGGGG |
| <i>ADRA2A</i>              | TGGTCGTTGATCTCGCAGCG |
| <i>VCL</i>                 | CGTATGAAACACTGGCATCG |
| <i>CDKN1A</i> (p21)        | GTCGAAGTTCCATCGCTCAC |
| Murine <i>cdkn1a</i> (p21) | GCGCAACTGCTCACTGTCCA |
| Murine <i>Trp53</i>        | ACTCCAGGTAGGAAGGCGCG |
| Murine <i>Arl8b</i>        | AGATGGAAGTACGCTCGTG  |

**Supplementary Table 3: Primers for PCR and Sanger sequencing (for further indels quantification by ICE).**

| Primers PCR           |                          |                   |
|-----------------------|--------------------------|-------------------|
| Indels analysis       |                          | Target cells      |
| <i>UROS F</i>         | TAGTTCCAGGCACATAGTAAGCAC | Human Fibroblasts |
| <i>UROS R</i>         | AGGAGGTGAACAACGAATAGACAG |                   |
| <i>TP53 F</i>         | TGGTCTCTGACTGCTCTTTTC    | Human Fibroblasts |
| <i>TP53 R</i>         | GGAAGCCAAAGGGTGAAGAGG    |                   |
| <i>ABRAXAS2 F</i>     | TGATGAAAGACATCAGGGCGA    | Human Fibroblasts |
| <i>ABRAXAS2 R</i>     | AAGAGCGTTTGAAGTGGCCT     |                   |
| <i>SORCS1 F</i>       | TTGGATCTGAGTGCTGAACTGG   | Human Fibroblasts |
| <i>SORCS1 R</i>       | TGAACGCCCCACAAATGCTC     |                   |
| b-Globin region F     | AGCACCGCCTATCTATGTGC     | HSPC              |
| b-Globin region R     | GGAAACTGGATGCAGAGACCA    |                   |
| <i>CPXM2 F</i>        | GAGACCAGAGCAGTCATAGCCT   | Human Fibroblasts |
| <i>CPXM2 R</i>        | GACAGTGCCCTCCTCTTCT      |                   |
| <i>PLEKHA1 F</i>      | TTAGGCTGATAGCCCTGAAGAG   | Human Fibroblasts |
| <i>PLEKHA1 R</i>      | AATTTGATAGGATGGGGGAGAC   |                   |
| <i>TRUB1 F</i>        | TGCATAACAGTTTTTGTGGCC    | Human Fibroblasts |
| <i>TRUB1 R</i>        | TAGCCCAAAGAAACACACTGAG   |                   |
| <i>ADRA1 F</i>        | ACACAGGCCATCGAGTACAAC    | Human Fibroblasts |
| <i>ADRA1 R</i>        | CTGGTAGATGCGCACGTAGAC    |                   |
| <i>VCL F</i>          | CCGTGGATCCTACTTCTCTGTC   | Human Fibroblasts |
| <i>VCL R</i>          | GTGAGGTCAGGAATGGCTTTG    |                   |
| <i>CDKN1A/p21 F</i>   | GCGACTGTGATGCGCTAAT      | Human Fibroblasts |
| <i>CDKN1A/p21 R</i>   | CAAGACAGTGACAGGTCCACAT   |                   |
| Murine <i>Trp53 F</i> | CGGCTCTGAGTATAACCACCATC  | MEFs              |
| Murine <i>Trp53 R</i> | CAAGAGGAAACAGAGGAGGAGA   |                   |
| Murine p21 F          | CTTAGTCTCATGGTGTGGTGGA   | MEFs              |
| Murine p21 R          | GAAGTCAAAGTTCCACCGTTCT   |                   |
| Murine <i>arl8b F</i> | AAAGAGTGCCGCTGTCGTC      | MEFs              |
| Murine <i>arl8b R</i> | GCGATGACATTGACGAAGGT     |                   |

**Supplementary Table 4: Primers for SNP analysis and qPCR.**

| Primers PCR and AS-PCR                                |                   |                                  |              |
|-------------------------------------------------------|-------------------|----------------------------------|--------------|
| Target loci                                           | Primer sequences  |                                  | Target cells |
| <i>DOCK1</i><br><i>rs867002</i><br><i>rs867003</i>    | DOCK1 F           | ACCTACCGGCGATCATGAAG             | Fibroblasts  |
|                                                       | DOCK1 R           | CCAACCCCTGTTCTCACACA             |              |
| <i>MGMT</i><br><i>rs511361</i><br><i>rs1846361104</i> | MGMT F            | TCTCCCACTGTTGGTCGTTG             | Fibroblasts  |
|                                                       | MGMT R            | GGATCCCTTTTCCGGGTCTC             |              |
| <i>KCNQ1</i><br><i>rs8234</i>                         | KCNQ1 #2 A F      | GGGTTCCCTTCTGGGCAT <u>C</u> ACA  | HSPC         |
|                                                       | KCNQ1 #2 G F      | GGGTTCCCTTCTGGGCAT <u>C</u> ACG  |              |
|                                                       | KCNQ1 #2 common R | CAGGAACCAAGGTGAGAGCAGT           |              |
| <i>H19</i><br><i>rs2839704</i>                        | H19 A F           | GAGACGGCCTTGAGTCTC <u>G</u> GTA  | HSPC         |
|                                                       | H19 G F           | AGACGGCCTTGAGTCTC <u>G</u> GTG   |              |
|                                                       | H19 common R      | CTTGAAGGCTGCTCCGTGATGT           |              |
| <i>IGF2</i><br><i>rs680</i>                           | IGF2 A F          | GAACCAGCAAAGAGAAAAG <u>G</u> GGA | HSPC         |
|                                                       | IGF2 G F          | AACCAGCAAAGAGAAAAG <u>G</u> GGG  |              |
|                                                       | IGF2 common R     | GAGCCAGTCTGGGTTGTTGCTA           |              |
| <i>tdTomato</i>                                       | tdTomato F        | CAACTGCCCCGGCTACTACTAC 3'        | MEF          |
|                                                       | tdTomato R        | GACGGCCATGTTGTTGTCCTC            |              |
| <i>Beta-actin</i>                                     | Beta-actin F      | CATTGCTGACAGGATGCAGAAGG          | MEF          |
|                                                       | Beta-actin R      | TGCTGGAAGGTGGACAGTGAGG           |              |
